# Supplementary material for: Caenorhabditis elegans ABL-1 antagonizes p53-mediated germline apoptosis after ionizing irradiation
Source: Springer Nature journal article supplement (doi:10.1038/ng1396), 2004-07-25
Supplement: ng1396-S5.pdf [file ng1396-S5.pdf]

**Supplementary Table 1**  
**Germ cell corpses are removed at a normal rate**  
**in *abl-1(ok171)***

| Worm<br>No.                                | Corpse persistence (min)         |                                  |                     |
|--------------------------------------------|----------------------------------|----------------------------------|---------------------|
|                                            | wild-type                        | <i>abl-1(ok171)</i>              | <i>ced-1(e1735)</i> |
| 1                                          | 30                               | 20                               | > 180               |
| 2                                          | 60                               | 20                               | > 180               |
| 3                                          | 25                               | 45                               | > 180               |
| 4                                          | 25                               | 30                               | > 180               |
| 5                                          | 45                               | 10                               | > 180               |
| 6                                          | 35                               | 50                               | > 180               |
| 7                                          | 45                               | 15                               | > 180               |
| 8                                          | 45                               | 35                               | > 180               |
| 9                                          | 20                               | 30                               | > 180               |
| 10                                         | 20                               | 100                              |                     |
| <b><math>\bar{x} \pm \text{SEM}</math></b> | <b><math>35.0 \pm 3.5</math></b> | <b><math>35.5 \pm 7.5</math></b> | <b>&gt; 180</b>     |

At 36 hours post 120 Gy, germ cell apoptosis was scored in the distal gonad of individual wild-type, *abl-1(ok171)* and *ced-1(e1735)* worms under Nomarski Optics. Cell corpses were monitored for 3 hours from their appearance.
