# Supplementary material for: Caenorhabditis elegans ABL-1 antagonizes p53-mediated germline apoptosis after ionizing irradiation
Source: Springer Nature journal article supplement (doi:10.1038/ng1396), 2004-07-25
Supplement: ng1396-S6.pdf [file ng1396-S6.pdf]

**Supplementary Table 2**  
**Programmed cell death genes are required for radiation**  
**-induced germ cell apoptosis in *abl-1(ok171)***

| Genotyp                                 | n  | No. of germ<br>/gonad arm $\pm$ SEM |
|-----------------------------------------|----|-------------------------------------|
| Wild-type                               | 68 | 5.0 $\pm$ 0.3                       |
| <i>abl-1(ok171)</i>                     | 53 | 17.7 $\pm$ 1.3                      |
| <i>ced-3(n717)</i>                      | 14 | 0.1 $\pm$ 0.1                       |
| <i>ced-9(n1950)</i>                     | 16 | 1.3 $\pm$ 0.2                       |
| <i>egl-1(n1084 n3082)</i>               | 11 | 1.1 $\pm$ 0.4                       |
| <i>ced-3(n717); abl-1(ok171)</i>        | 20 | 0.2 $\pm$ 0.1                       |
| <i>ced-9(n1950); abl-1(ok171)</i>       | 14 | 1.5 $\pm$ 0.3                       |
| <i>egl-1(n1084 n3082); abl-1(ok171)</i> | 42 | 4.8 $\pm$ 0.2                       |

Germ cell corpses were scored 36 hours post 120 Gy. n represents the number of worms examined.
